# Supplementary material for: High-Performance Thermal Interface Materials with Magnetic Aligned Carbon Fibers
Source: MDPI journal article supplement (doi:10.3390/ma15030735), 2022-01-19
Supplement: s1 [file s1]

## Supplementary materials

# High Performance Thermal Interface Materials with Magnetic Aligned Carbon Fibers

Qi Wu <sup>1</sup>, Jianyin Miao <sup>1,\*</sup>, Wenjun Li <sup>1</sup>, Qi Yang <sup>1</sup>, Yanpei Huang <sup>1,2</sup>, Zhendong Fu <sup>1</sup> and Le Yang <sup>1</sup>

### Theoretical calculation of the alignment time of CF in matrix

Kimura model

$$t = -\frac{6\mu_0\eta}{F(D)\chi_a B^2} \ln\left(\frac{\tan\theta}{\tan\theta_0}\right)$$

with

$$F(D) = \frac{3D\left(-2D\sqrt{D^2-1} + (1-2D^2)\ln\frac{D-\sqrt{D^2-1}}{D+\sqrt{D^2-1}}\right)}{4(D^2-1)(D^2+1)\sqrt{D^2-1}}$$

Where  $D$  is the aspect ratio,  $\mu_0$  is the magnetic permeability of vacuum ( $4\pi\times10^{-7}\text{T}\cdot\text{m/A}$ ),  $\eta$  is the viscosity of the matrix,  $\chi_a$  is the volume anisotropic diamagnetic susceptibility,  $B$  is the magnetic flux density,  $\theta$  and  $\theta_0$  are the initial angle and final angle between  $B$  and the fiber axis respectively,  $t$  is the alignment time. In this work, these parameters are input as follows:  $D = 15$ ,  $\eta = 1/10/100\text{Pa}\cdot\text{s}$ ,  $\chi_a = 4.0\times10^{-6}$ ,  $B = 0/1/3/5/7/9\text{T}$ ,  $\theta = 1^\circ$ ,  $\theta_0 = 90^\circ$ .

### The detailed size of the test system

**Table S1.** The detailed size of the test system

| Component             | Number | Size (mm)           |
|-----------------------|--------|---------------------|
| Ceramic heating plate | 1      | 30×30×2             |
| Upper aluminium plate | 1      | 45×45×2 (baseplate) |

|                       |   |                    |
|-----------------------|---|--------------------|
|                       |   | 15×15×3 (lug boss) |
| Lower aluminium plate | 1 | 60×60×7            |
| CF-rubber composite   | 1 | 15×15×1            |
| Polyimide screws      | 4 | Φ3                 |
